# Supplementary material for: Shape-controlled synthesis of β-In2S3nanocrystals and their lithium storage properties
Source: Royal Society of Chemistry journal article supplement (doi:10.1039/c5ce01955a), 2015-11-23
Supplement: c5ce01955a1.pdf [file c5ce01955a1.pdf]

**Electronic supplementary information**

**Shape-controlled synthesis of  $\beta$ -In<sub>2</sub>S<sub>3</sub> nanocrystals and their  
lithium storage properties**

Bin Xue, Fangjie Xu, Biwei Wang, Angang Dong\*

Collaborative Innovation Center of Chemistry for Energy Materials, Shanghai Key Laboratory of Molecular Catalysis and Innovative Materials, and Department of Chemistry, Fudan University, Shanghai 200433, China.

\*To whom correspondence should be addressed: [agdong@fudan.edu.cn](mailto:agdong@fudan.edu.cn) (A.D.)

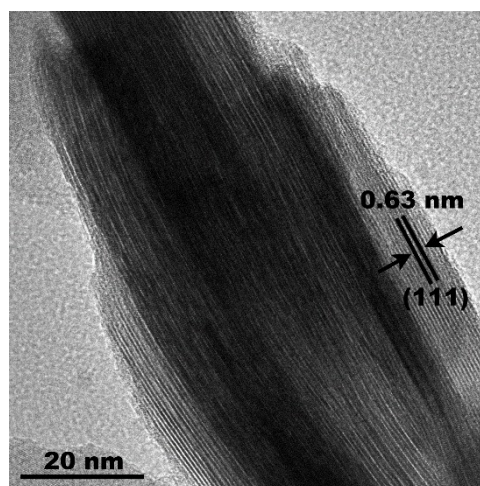

**Fig. S1** Representative HRTEM images of the as-synthesized  $\text{In}_2\text{S}_3$  nanosheets.

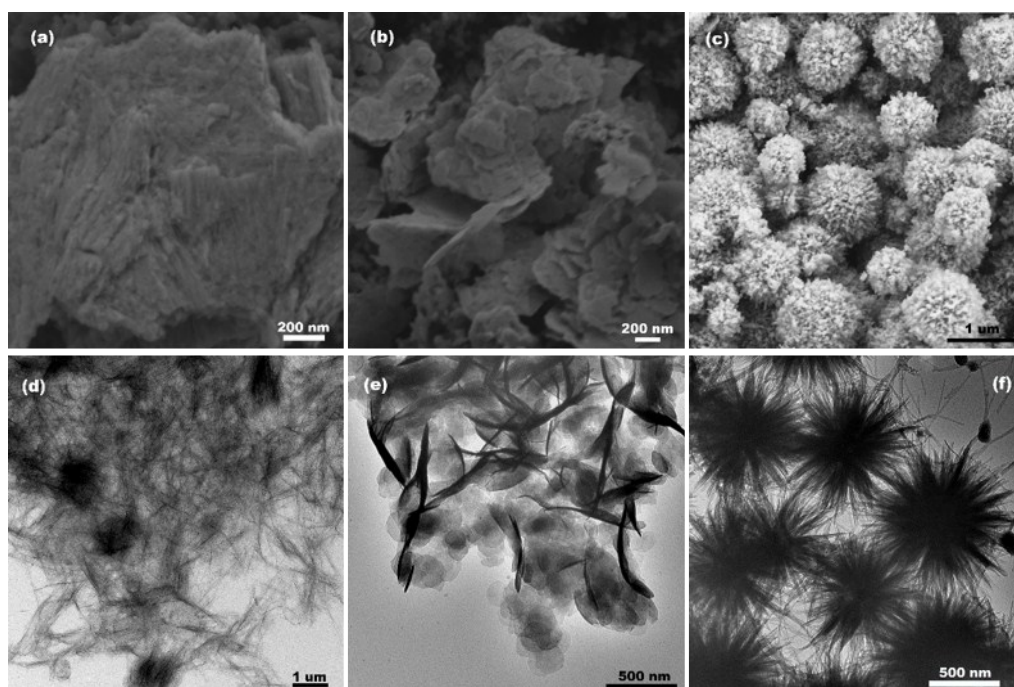

**Fig. S2** Representative SEM (top) and TEM (bottom) images of  $\text{In}_2\text{S}_3/\text{C}$  nanocomposites: nanotubes (a, d), nanosheets (b, e), and nanoflowers (c, f).

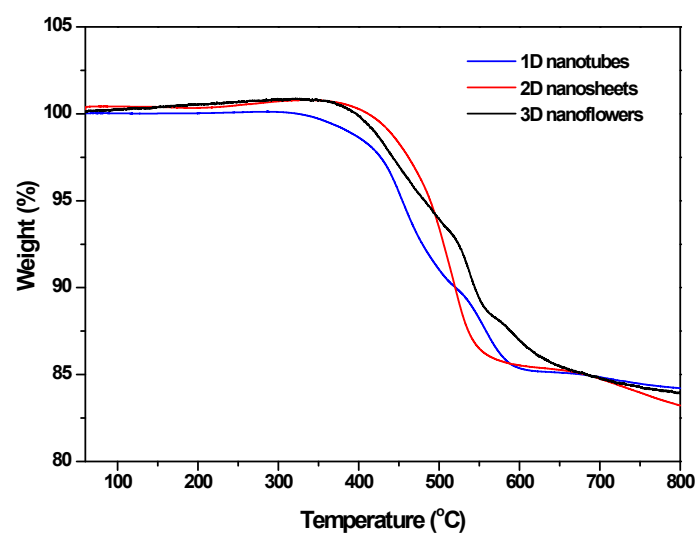

**Fig. S3** TGA profiles of various  $\text{In}_2\text{S}_3/\text{C}$  nanocomposites

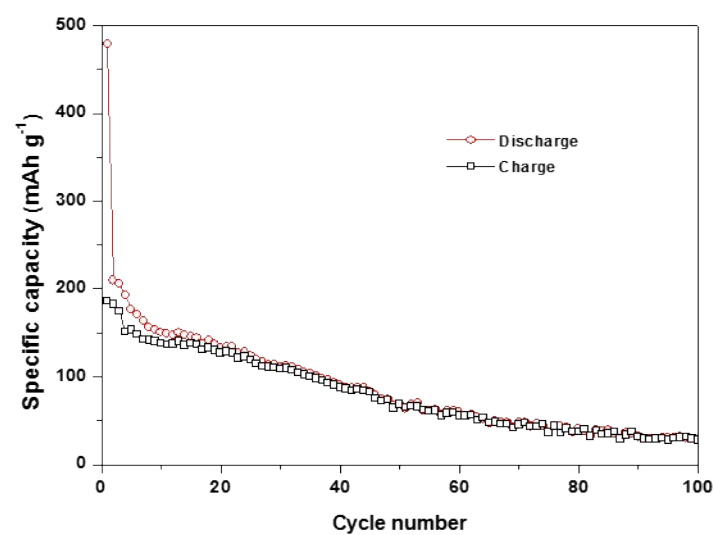

**Fig. S4** Cycling performance of 2D  $\text{In}_2\text{S}_3$  nanosheets before carbonization at a current density of  $500 \text{ mA g}^{-1}$
